# Supplementary material for: A Large-Area Nanoplasmonic Sensor Fabricated by Rapid Thermal Annealing Treatment for Label-Free and Multi-Point Immunoglobulin Sensing
Source: MDPI journal article supplement (doi:10.3390/nano7050100), 2017-05-02
Supplement: s1 [file s1]

# Supplementary Materials: A Large-Area Nanoplasmonic Sensor Fabricated by Rapid Thermal Annealing Treatment for Label-Free and Multi-Point Immunoglobulin Sensing

Hana Tzu-Han Lin, Chuan-Kai Yang, Chi-Chen Lin, Albert Meng-Hsin Wu, Lon A. Wang and Nien-Tsu Huang

**Table S1.** AFM images and structural characteristics per square micrometer five independent chips with deposition thickness of 10 nm under 5 min, 900 °C RTA treatment.

| Chip #                                                   | 1                                                                                 | 2                                                                                 | 3                                                                                  | 4                                                                                   | 5                                                                                   |
|----------------------------------------------------------|-----------------------------------------------------------------------------------|-----------------------------------------------------------------------------------|------------------------------------------------------------------------------------|-------------------------------------------------------------------------------------|-------------------------------------------------------------------------------------|
| AFM Images (size: 2 $\mu\text{m} \times 2 \mu\text{m}$ ) | 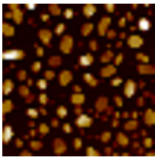 |  |  |  |  |
| Number of particles (Np)                                 | $27 \pm 5$                                                                        | $28 \pm 4$                                                                        | $34 \pm 4$                                                                         | $31 \pm 4$                                                                          | $31 \pm 2$                                                                          |
| Equivalent particle diameter (Da) (nm)                   | $119.7 \pm 57.5$                                                                  | $118.1 \pm 51.2$                                                                  | $106.3 \pm 51.4$                                                                   | $109.8 \pm 55.0$                                                                    | $116.9 \pm 48.9$                                                                    |
| Surface roughness (Ra) (nm)                              | $14.6 \pm 0.8$                                                                    | $14.2 \pm 0.5$                                                                    | $14.0 \pm 0.4$                                                                     | $14.5 \pm 0.5$                                                                      | $14.1 \pm 0.6$                                                                      |
| Total area of particle (Ap) (%)                          | $33.2 \pm 0.7$                                                                    | $33.8 \pm 1.8$                                                                    | $33.0 \pm 1.1$                                                                     | $32.1 \pm 1.5$                                                                      | $34.0 \pm 1.1$                                                                      |

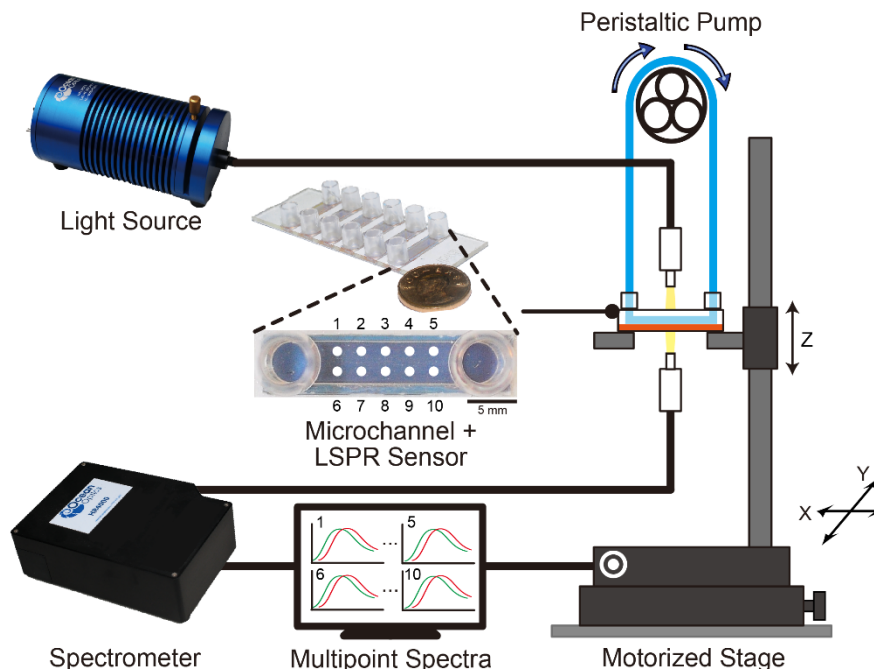

**Figure S1.** Schematic diagram of the LSPR sensing platform. Microchannel dimension is  $17 \times 3.8 \text{ mm}^2$  with 0.4 mm channel height. LSPR spectra at 10 different positions can be sequentially on the sensor. Each detection spot has a diameter of  $600 \mu\text{m}$  and is 1.25 mm apart from other spots.

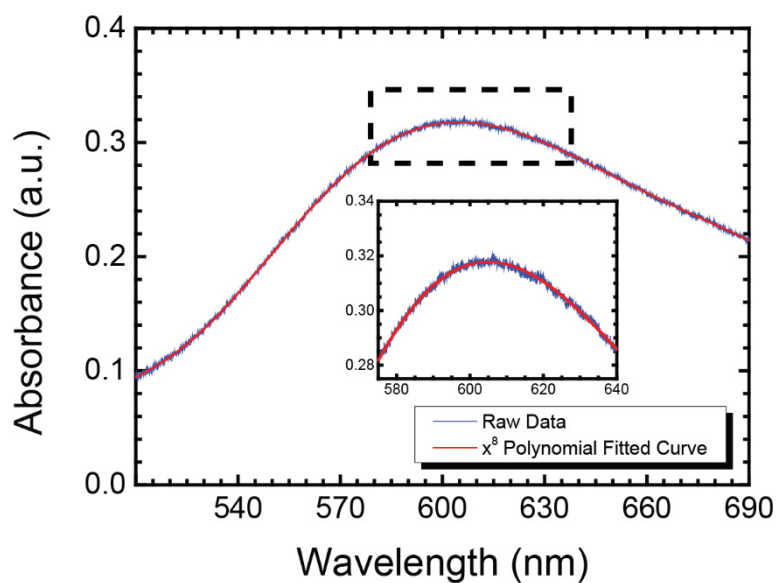

**Figure S2.**  $x^8$  polynomial curve-fitting algorithm to fit raw spectrum data. The spectral resolution of is 0.0558 nm and the noise level is only 1.18%.

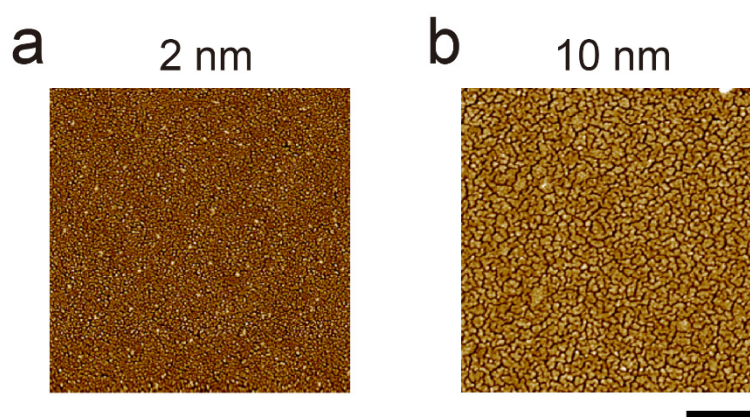

**Figure S3.** AFM images of (a) 2 nm and (b) 10 nm gold thin film without RTA treatment. Scale bar is 500 nm.

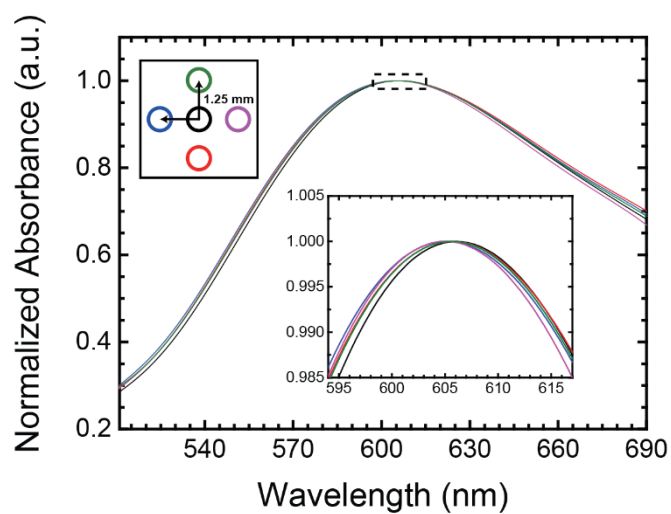

**Figure S4.** Absorbance spectrum uniformity of LSPR sensor. The standard deviation is 0.33 nm ( $n = 5$ ).
